# Supplementary material for: Metabolites of Medicarpin and Their Distributions in Rats
Source: PubMed Central journal article supplement (PMC6572127; doi:10.3390/molecules24101966), 2019-05-22
Supplement: molecules-24-01966-s001.pdf [file molecules-24-01966-s001.pdf]

# Supplementary materials

## Metabolites of Medicarpin and Their Distributions in Rats

Hong-Yan Wang<sup>1</sup>, Teng Li<sup>1</sup>, Rui Ji<sup>1,2</sup>, Feng Xu<sup>1,\*</sup>, Guang-Xue Liu<sup>1</sup>, Yao-Li Li<sup>1</sup>, Ming-Ying Shang<sup>1,\*</sup> and Shao-Qing Cai<sup>1</sup>

<sup>1</sup> State Key Laboratory of Natural and Biomimetic Drugs, School of Pharmaceutical Sciences, Peking University, No. 38, Xueyuan Road, Beijing 100191, China; wanghongyan@bjmu.edu.cn (H.-Y.W.); tengli1175@163.com (T.L.); jiruiwonder@163.com (R.J.); guangxl@bjmu.edu.cn (G.-X.L.); liyaoli123456@163.com (Y.-L.L.); sqcai@bjmu.edu.cn (S.-Q.C.)

<sup>2</sup> School of Pharmacy, Heilongjiang University of Chinese Medicine, No.24, Heping Road, Xiangfang District, Harbin 150040, China

\* Correspondence: xufeng76@bjmu.edu.cn (F.X.); myshang@bjmu.edu.cn (M.-Y.S.); Tel.: +86-10-8280-2534 (F.X. & M.-Y.S.)

### 1. The EICs of 165 metabolites in rats (Figure S1–S44)

(1) metabolites (M1–M3) having the skeleton of medicarpin

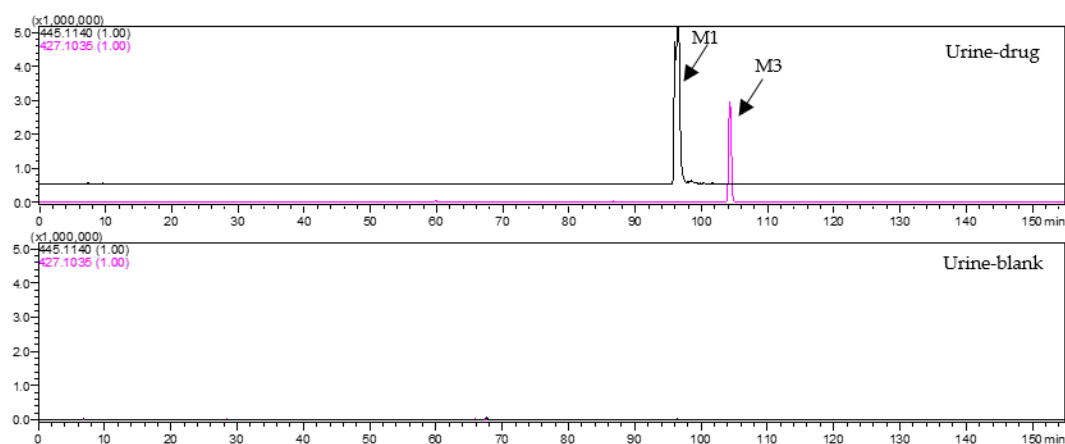

Figure S1. EICs of  $m/z$  445.1140 and  $m/z$  427.1035 in drug urine and blank urine in ESI- mode.

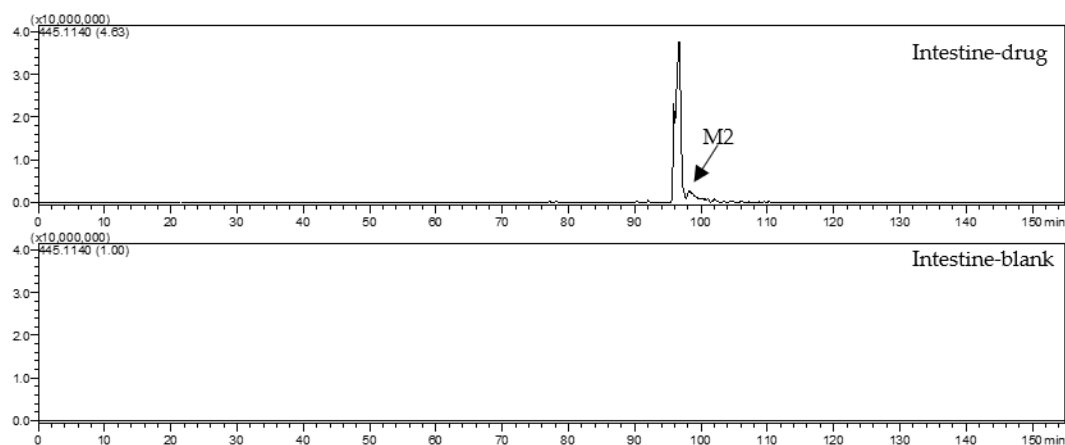

Figure S2. EICs of  $m/z$  445.1140 in drug intestine and blank intestine in ESI- mode.

(2) metabolites (M4-M10) having the skeleton of hydrogenated medicarpin

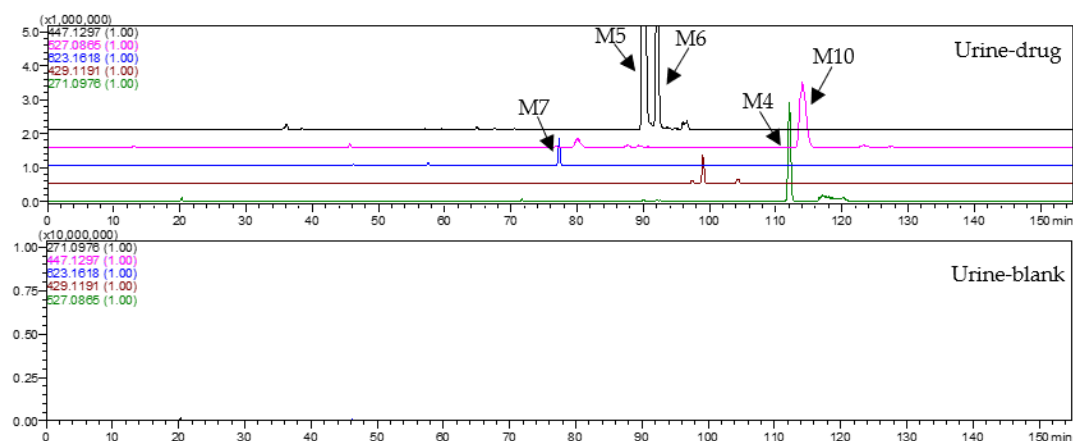

Figure S3. EICs of  $m/z$  447.1297,  $m/z$  527.0865,  $m/z$  623.1618,  $m/z$  429.1191 and  $m/z$  271.0976 in drug urine and blank urine in ESI- mode.

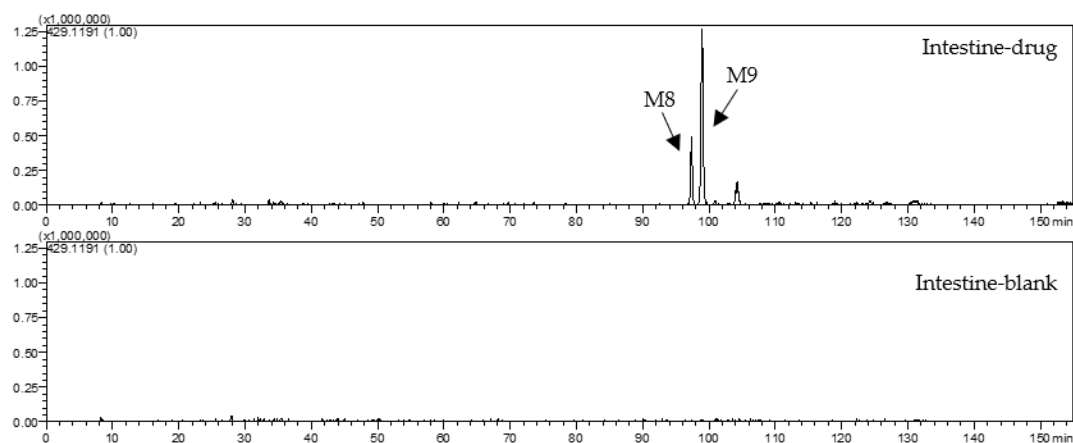

Figure S4. EICs of  $m/z$  429.1191 in drug intestine and blank intestine in ESI- mode.

(3) metabolites (M11-M26) having the skeleton of demethylated medicarpin

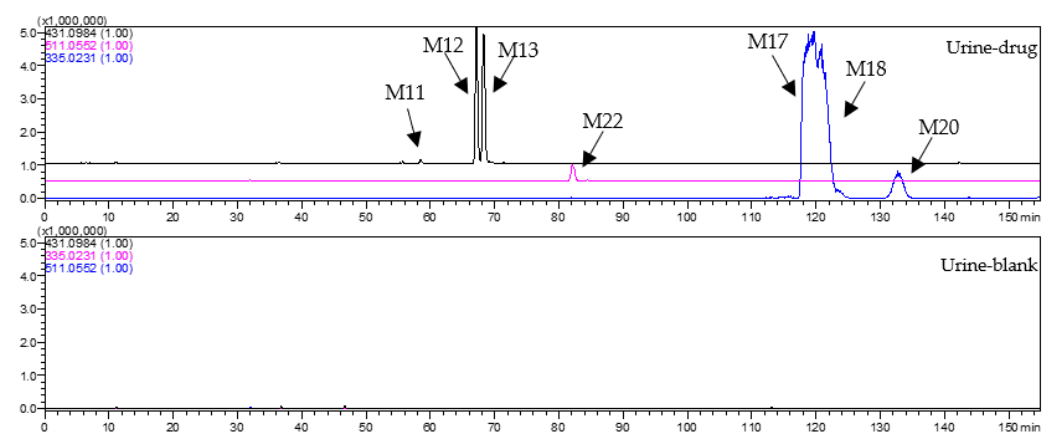

Figure S5. EICs of  $m/z$  431.0984,  $m/z$  511.0552 and  $m/z$  335.0231 in drug urine and blank urine in ESI- mode.

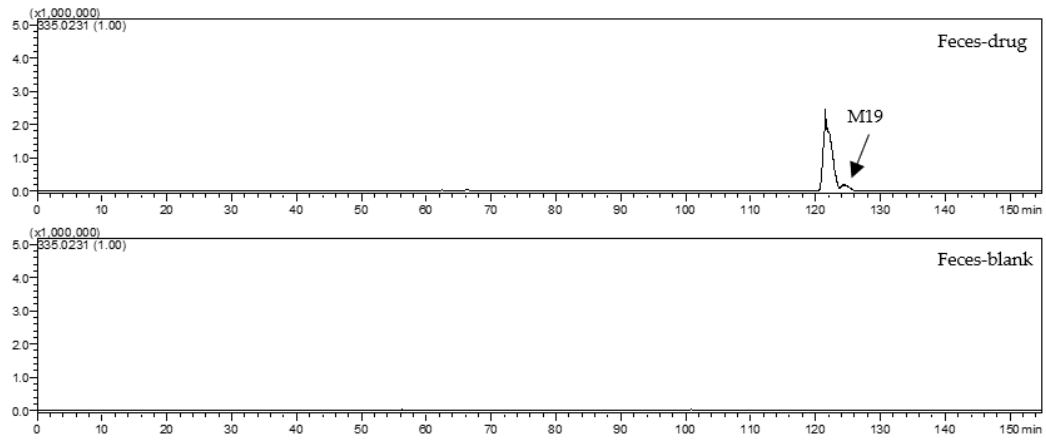

Figure S6. EICs of  $m/z$  335.0231 in drug feces and blank feces in ESI- mode.

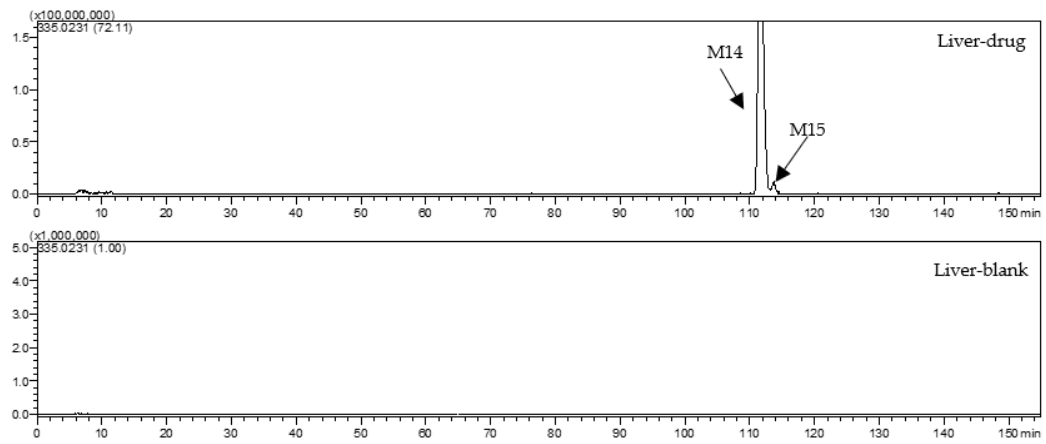

Figure S7. EICs of  $m/z$  335.0231 in drug liver and blank liver in ESI- mode.

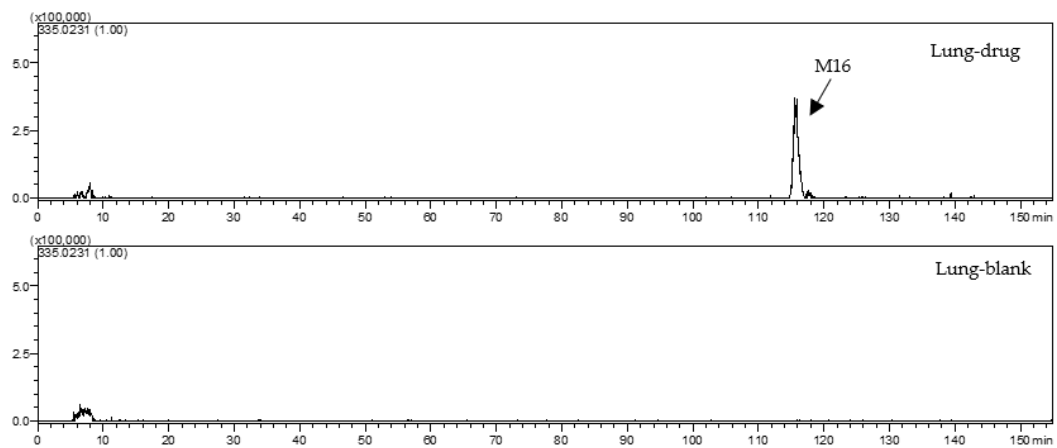

Figure S8. EICs of  $m/z$  335.0231 in drug lung and blank lung in ESI- mode.

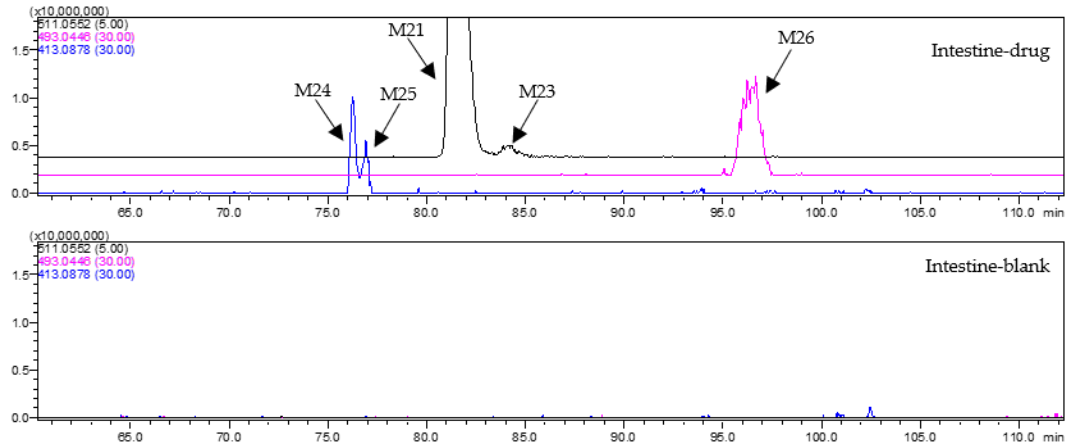

Figure S9. EICs of  $m/z$  511.0552,  $m/z$  493.0446 and  $m/z$  413.0873 in drug intestine and blank intestine in ESI- mode.

(4) metabolites (M27–M52) having the skeleton of demethylated and hydrogenated medicarpin

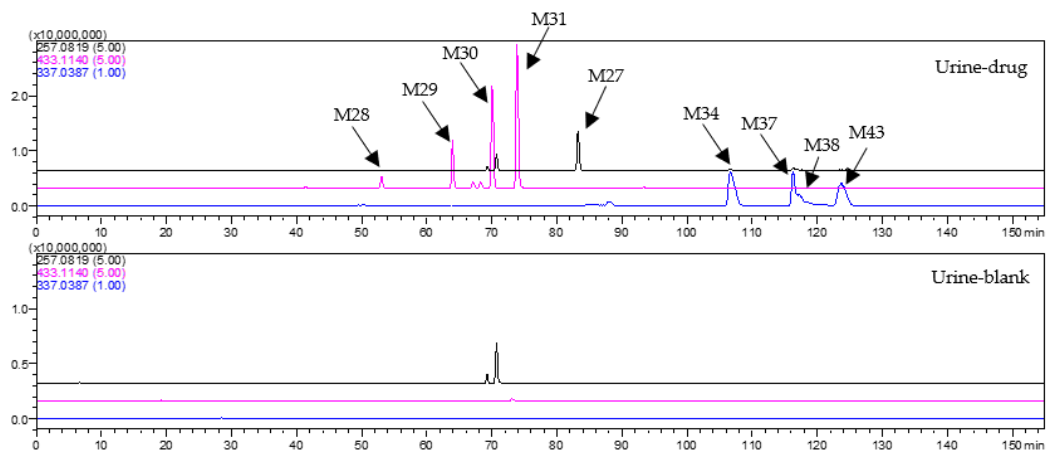

Figure S10. EICs of  $m/z$  257.0819,  $m/z$  433.1140 and  $m/z$  337.0387 in drug urine and blank urine in ESI- mode.

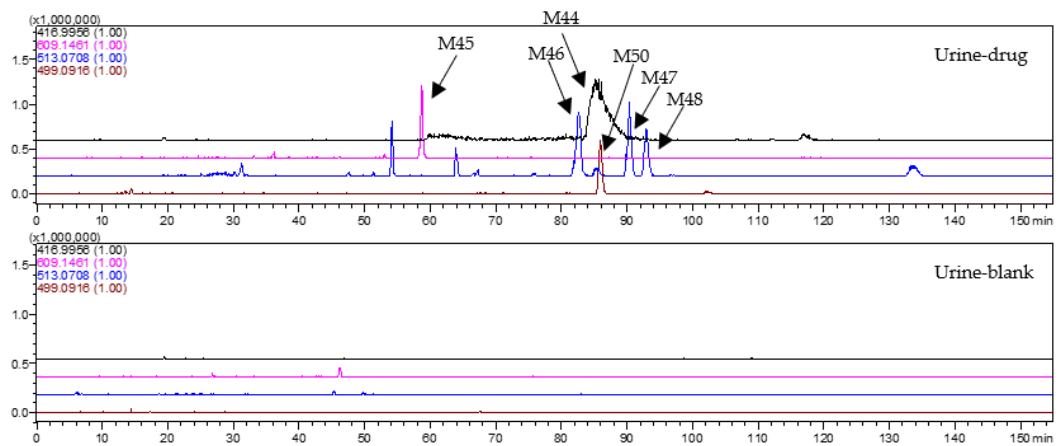

Figure S11. EICs of  $m/z$  416.9956,  $m/z$  609.1461,  $m/z$  513.0708 and  $m/z$  499.0916 in drug urine and blank urine in ESI- mode.

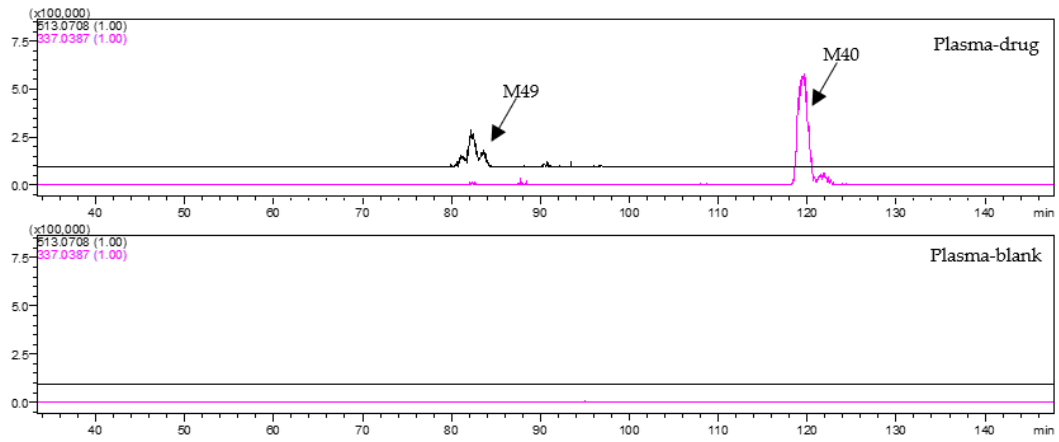

Figure S12. EICs of  $m/z$  513.0708 and  $m/z$  337.0387 in drug plasma and blank plasma in ESI- mode.

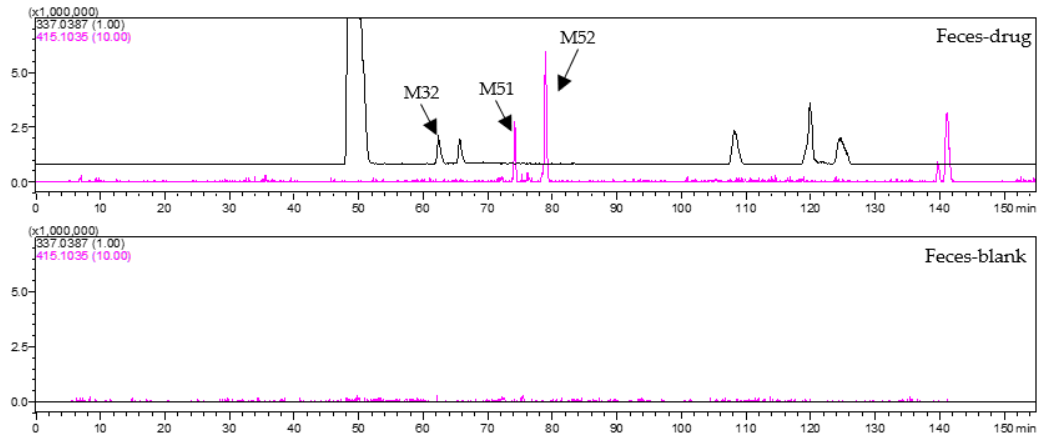

Figure S13. EICs of  $m/z$  337.0387 and  $m/z$  415.1035 in drug feces and blank feces in ESI- mode.

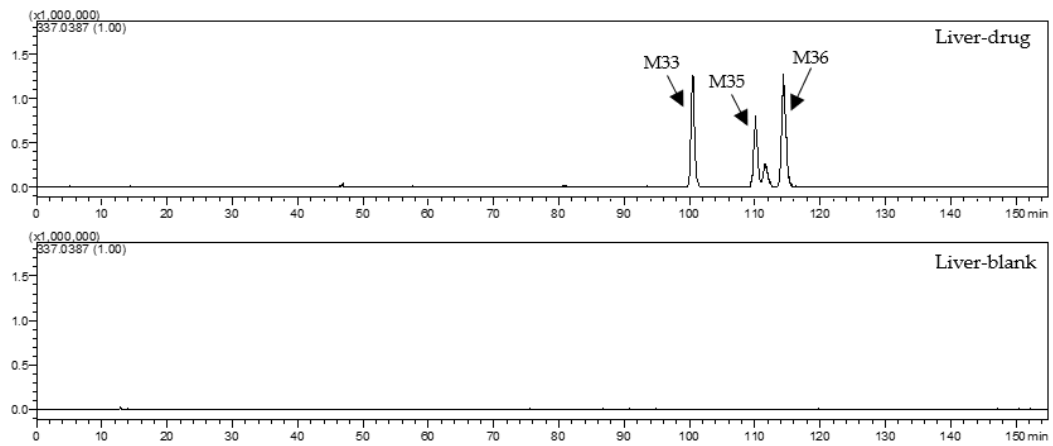

Figure S14. EICs of  $m/z$  337.0387 in drug liver and blank liver in ESI- mode.

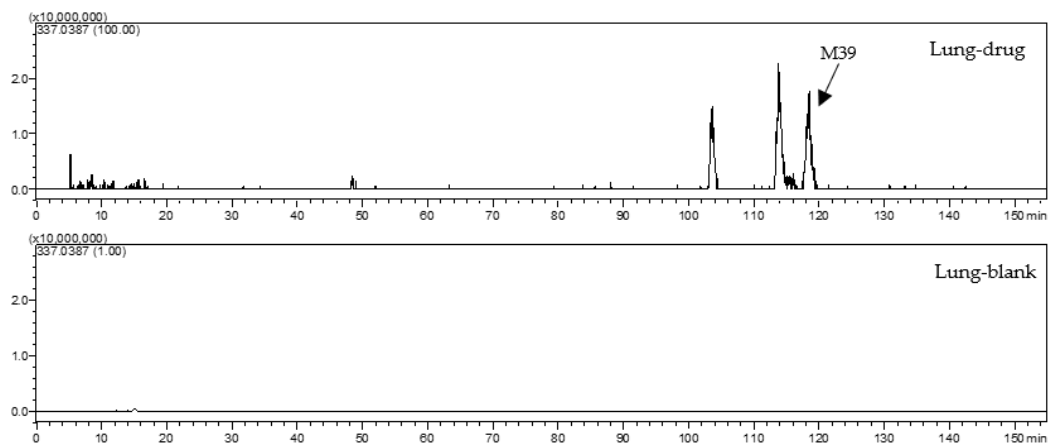

Figure S15. EICs of  $m/z$  337.0387 in drug lung and blank lung in ESI- mode.

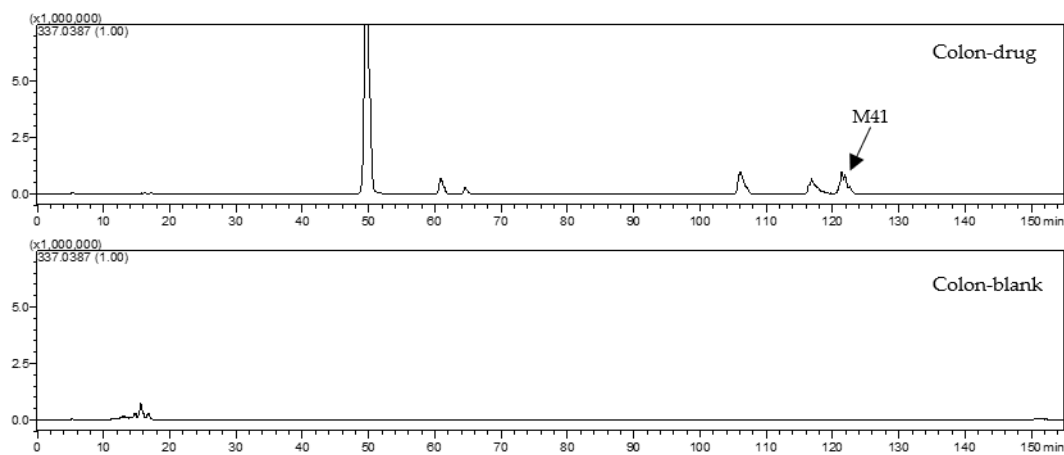

Figure S16. EICs of  $m/z$  337.0387 in drug colon and blank colon in ESI- mode.

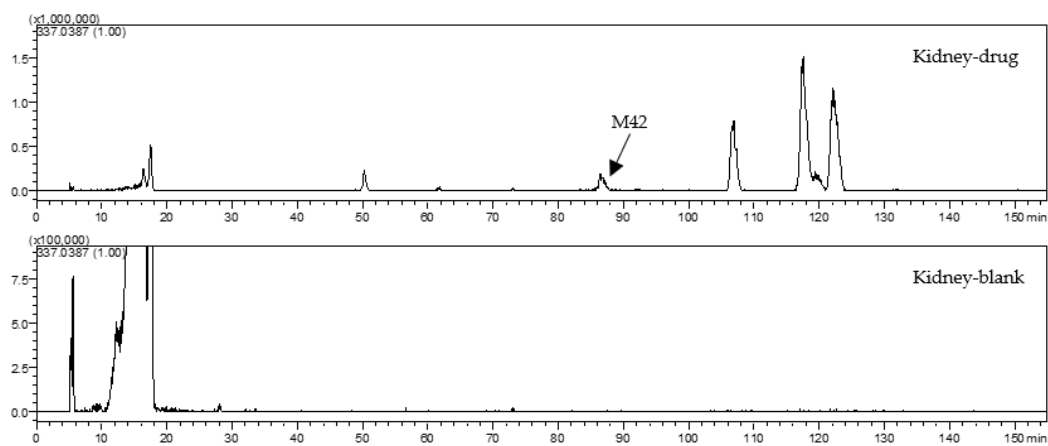

Figure S17. EICs of  $m/z$  337.0387 in drug kidney and blank kidney in ESI- mode.

(5) metabolites (M53–M75) having the skeleton of demethylated and hydroxylated medicarpin

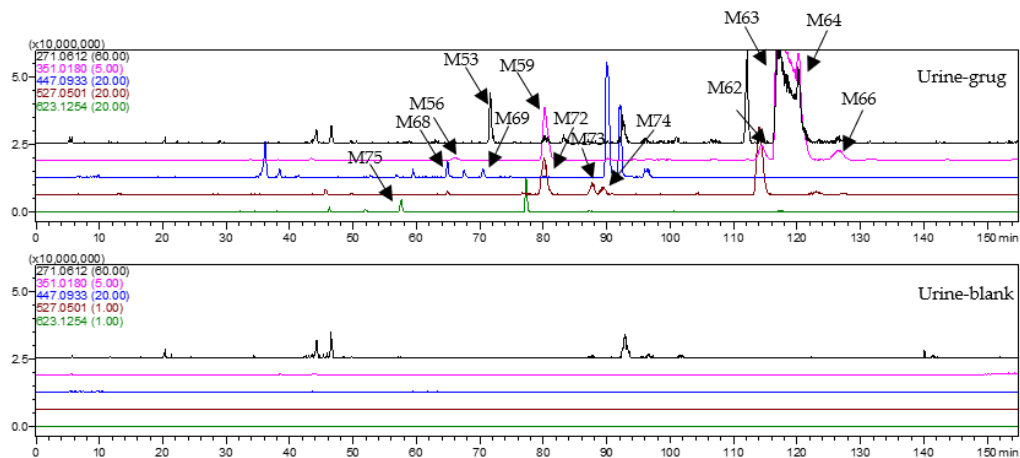

Figure S18. EICs of  $m/z$  271.0612,  $m/z$  351.0180,  $m/z$  447.0933,  $m/z$  527.0501 and  $m/z$  623.1254 in drug urine and blank urine in ESI- mode.

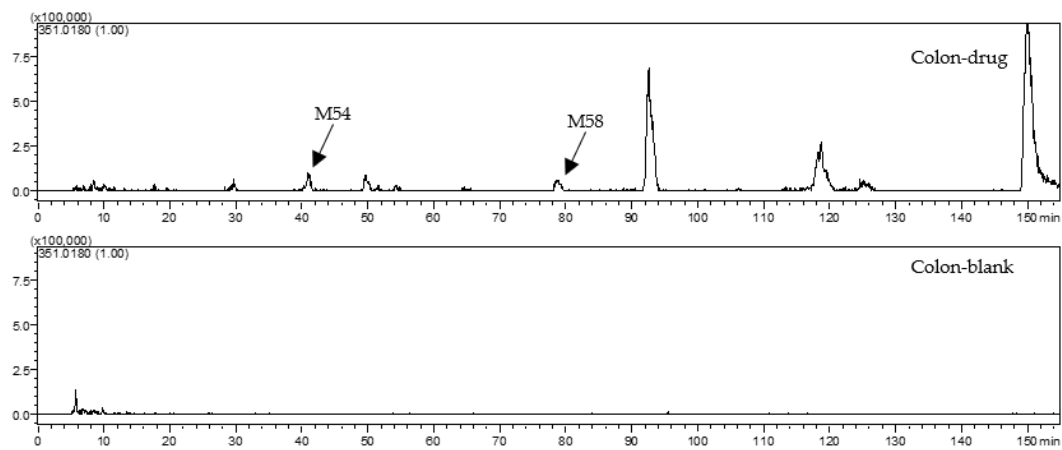

Figure S19. EICs of  $m/z$  351.0180 in drug colon and blank colon in ESI- mode.

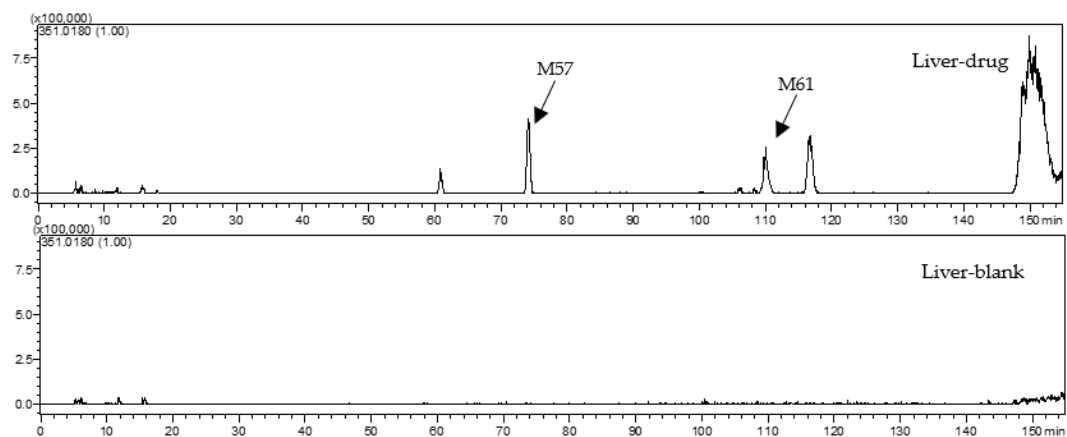

Figure S20. EICs of  $m/z$  351.0180 in drug liver and blank liver in ESI- mode.

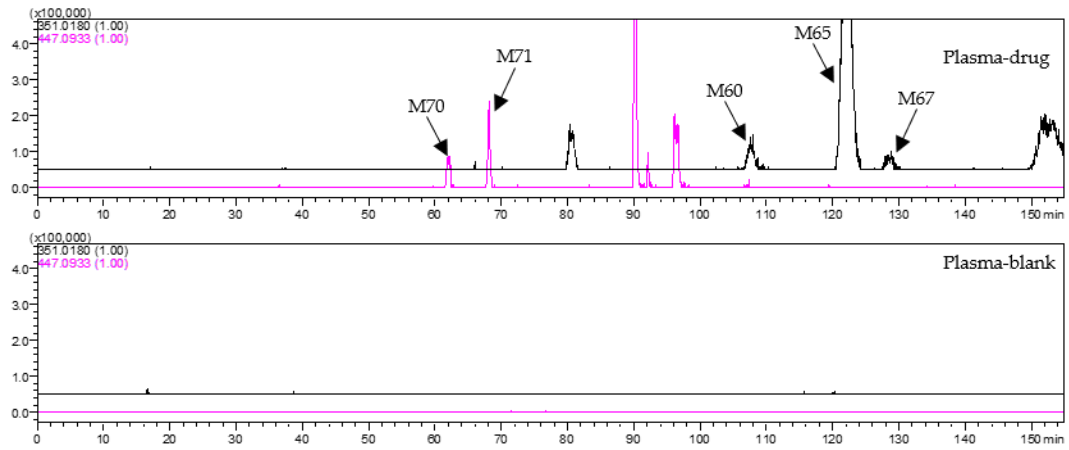

Figure S21. EICs of  $m/z$  351.0180 and 447.0933 in drug plasma and blank plasma in ESI- mode.

(6) metabolites (M76–M107) having the skeleton of hydroxylated medicarpin

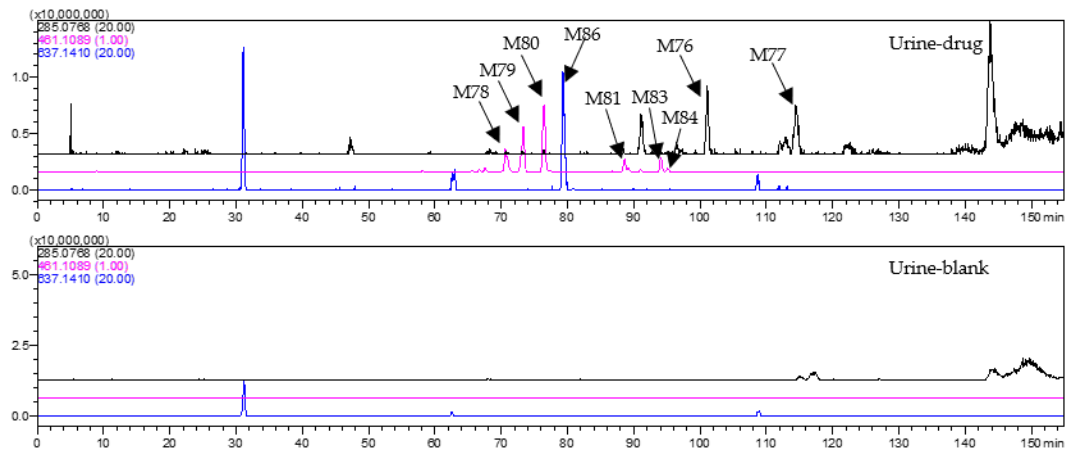

Figure S22. EICs of  $m/z$  285.0768,  $m/z$  461.1089 and  $m/z$  637.1410 in drug urine and blank urine in ESI- mode.

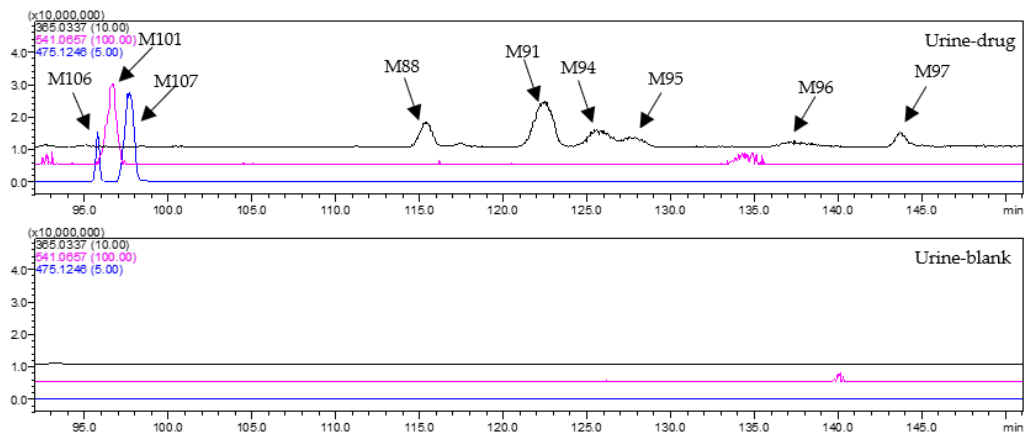

Figure S23. EICs of  $m/z$  365.0337,  $m/z$  541.0657 and  $m/z$  475.1246 in drug urine and blank urine in ESI- mode.



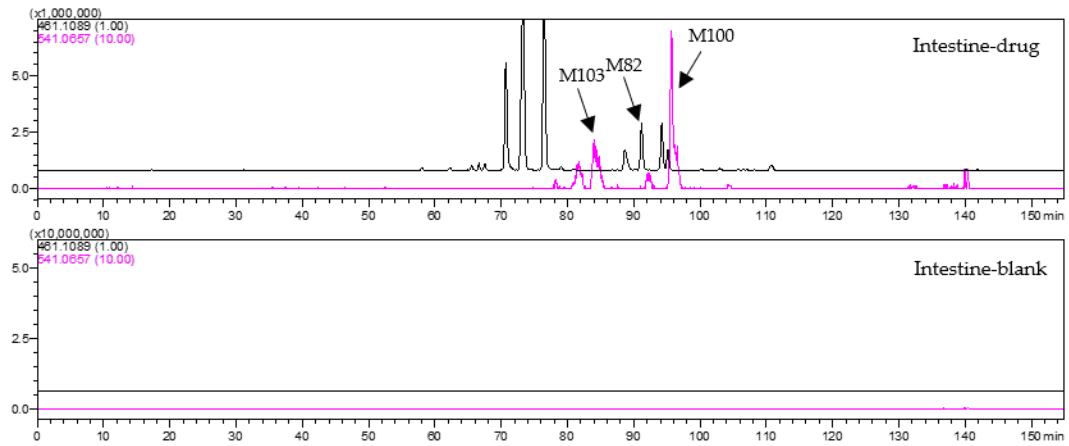

Figure S24. EICs of  $m/z$  461.1089 and 541.0657 in drug intestine and blank intestine in ESI- mode.

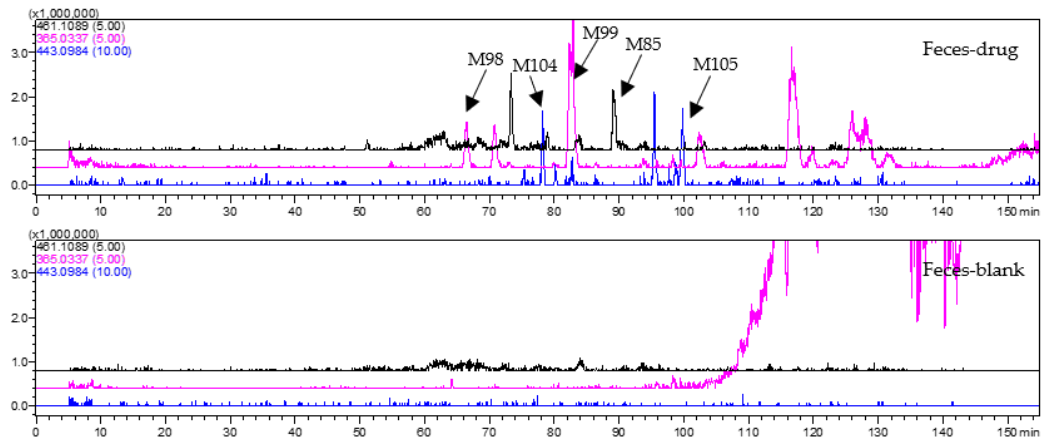

Figure S25. EICs of  $m/z$  461.1089,  $m/z$  365.0337 and  $m/z$  443.0984 in drug feces and blank feces in ESI- mode.

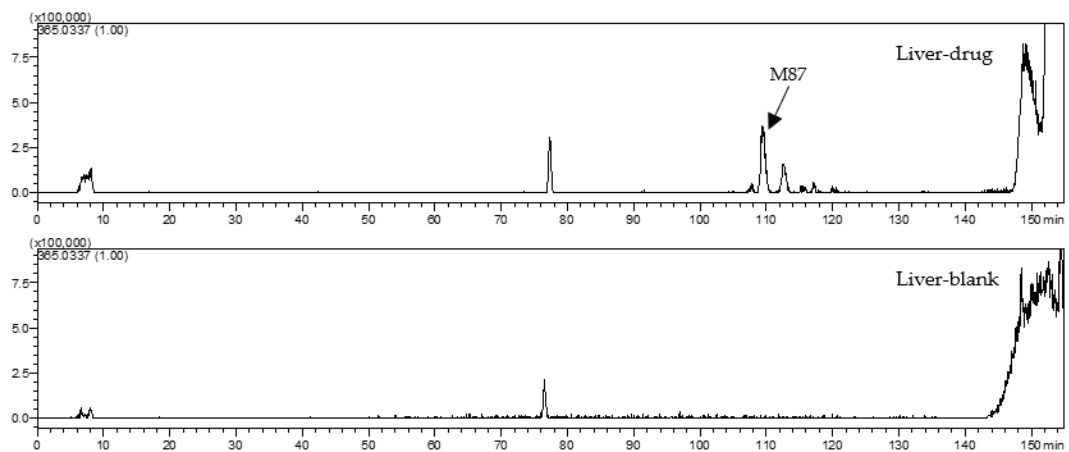

Figure S26. EICs of  $m/z$  365.0337 in drug liver and blank liver in ESI- mode.

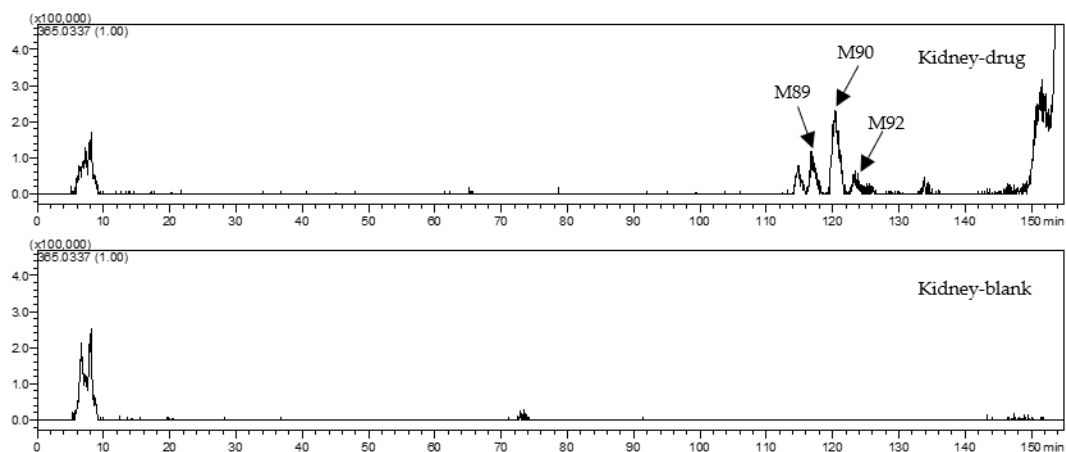

Figure S27. EICs of  $m/z$  365.0337 in drug kidney and blank kidney in ESI- mode.

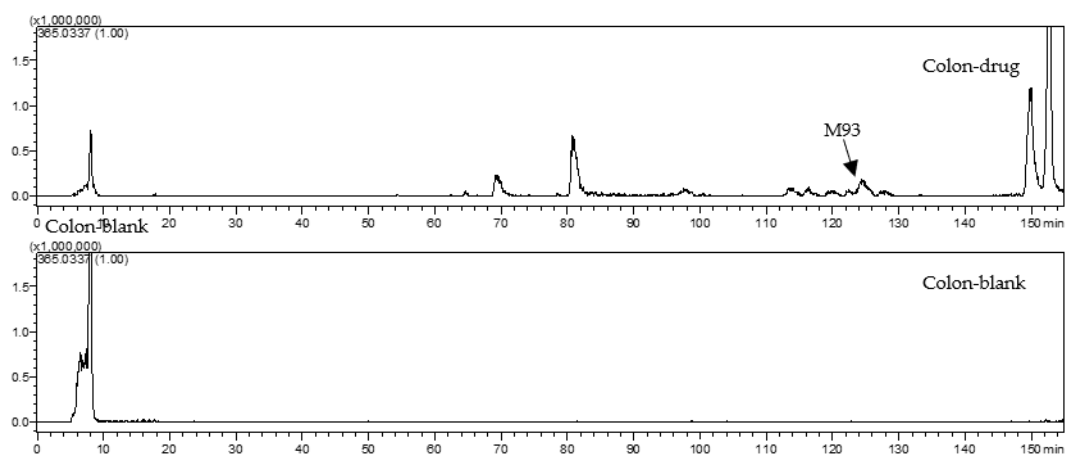

Figure S28. EICs of  $m/z$  365.0337 in drug colon and blank colon in ESI- mode.

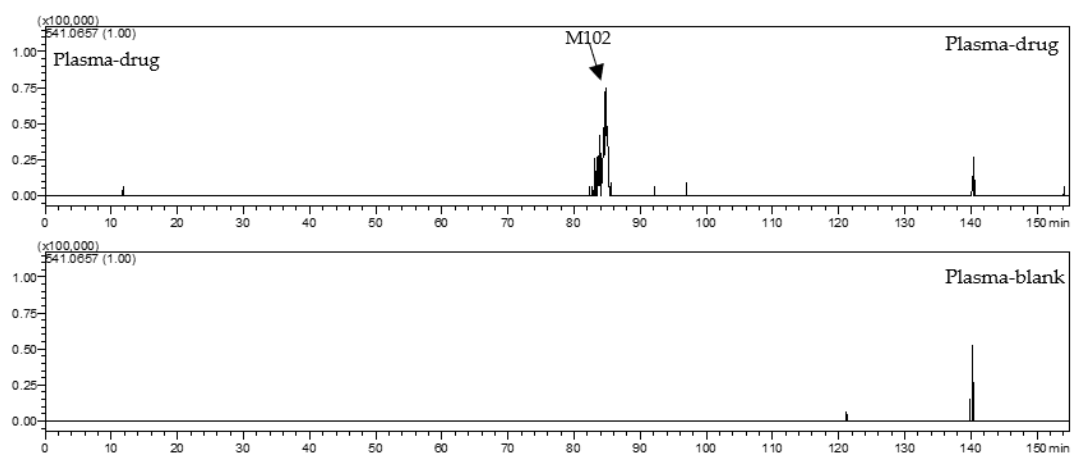

Figure S29. EICs of  $m/z$  541.0657 in drug plasma and blank plasma in ESI- mode.

(7) metabolites (M108–M138) having the skeleton of hydrogenated and hydroxylated medicarpin

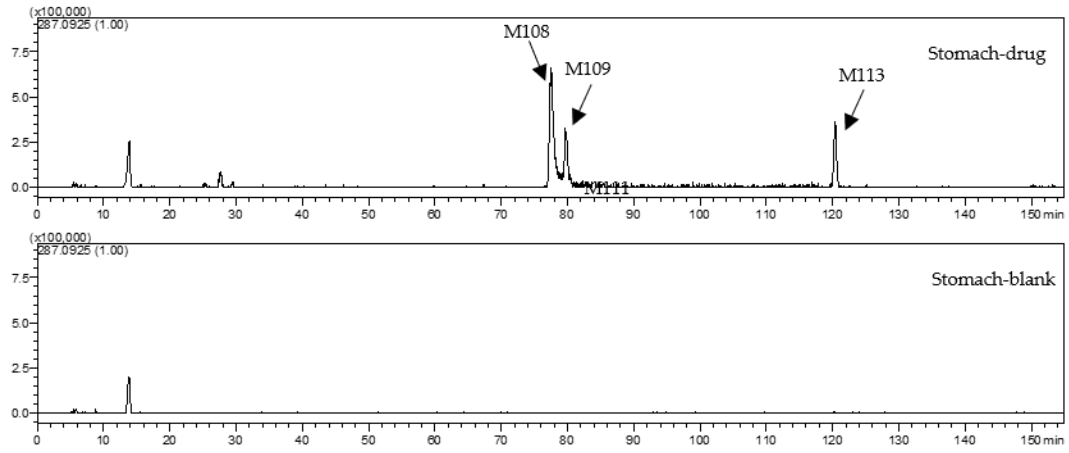

Figure S30. EICs of  $m/z$  287.0925 in drug stomach and blank stomach in ESI- mode.

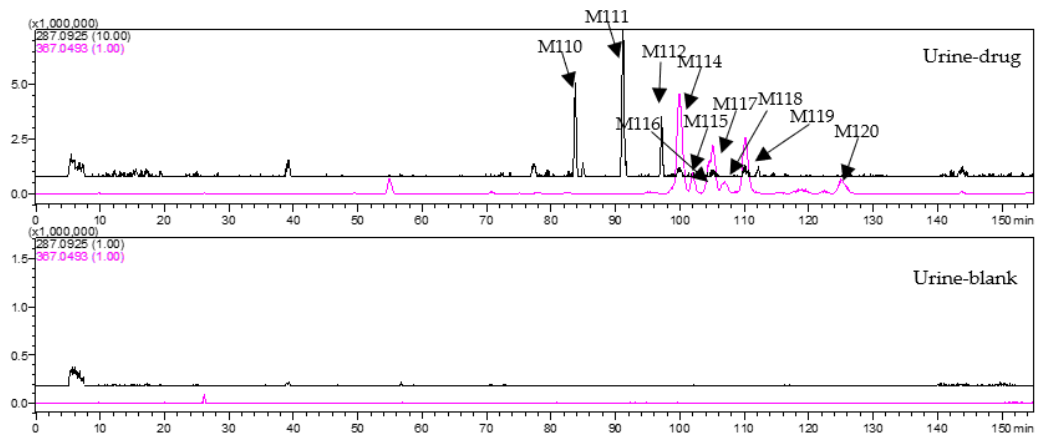

Figure S31. EICs of  $m/z$  287.0925 and 367.0493 in drug urine and blank urine in ESI- mode.

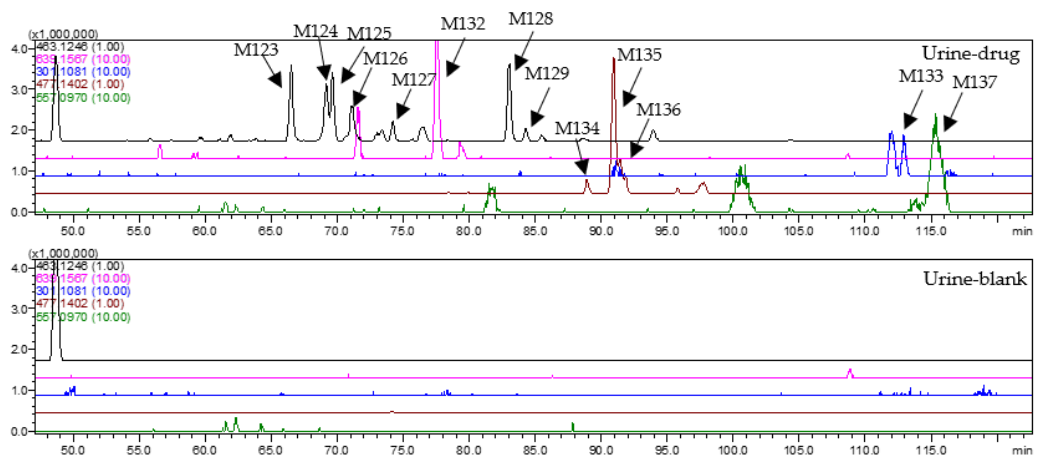

Figure S32. EICs of  $m/z$  463.1246,  $m/z$  639.1567,  $m/z$  301.1081,  $m/z$  477.1402 and  $m/z$  557.0970 in drug urine and blank urine in ESI- mode.

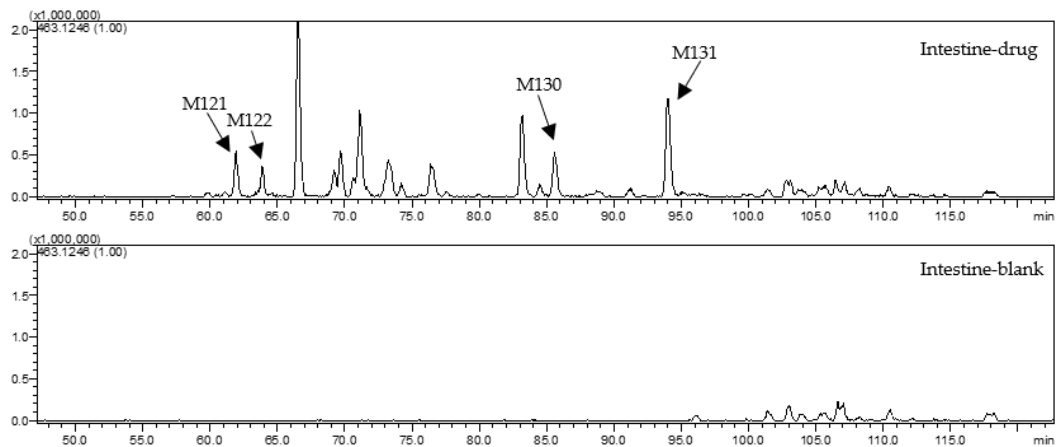

Figure S33. EICs of  $m/z$  463.1246 in drug intestine and blank intestine in ESI- mode.

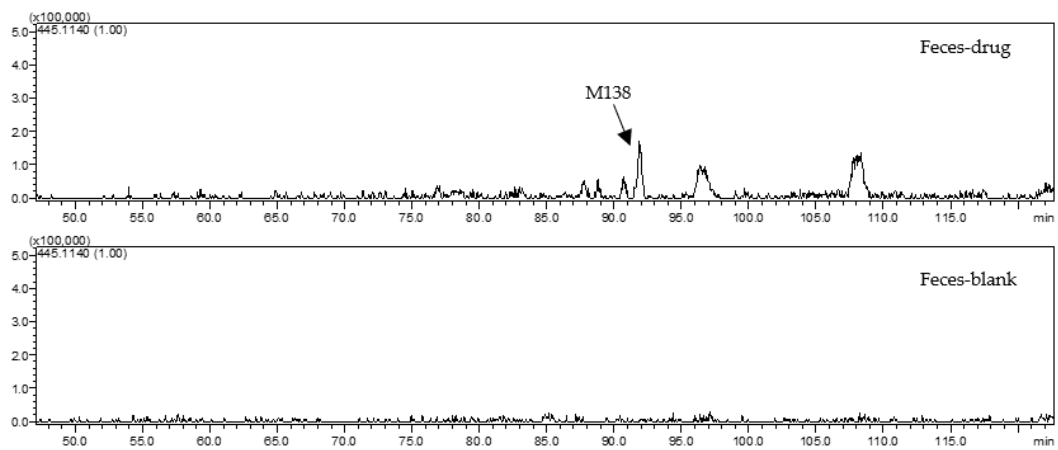

Figure S34. EICs of  $m/z$  445.1140 in drug feces and blank feces in ESI- mode.

(8) metabolites (M139–M149) having the skeleton of demethylated, hydrogenated and hydroxylated medicarpin

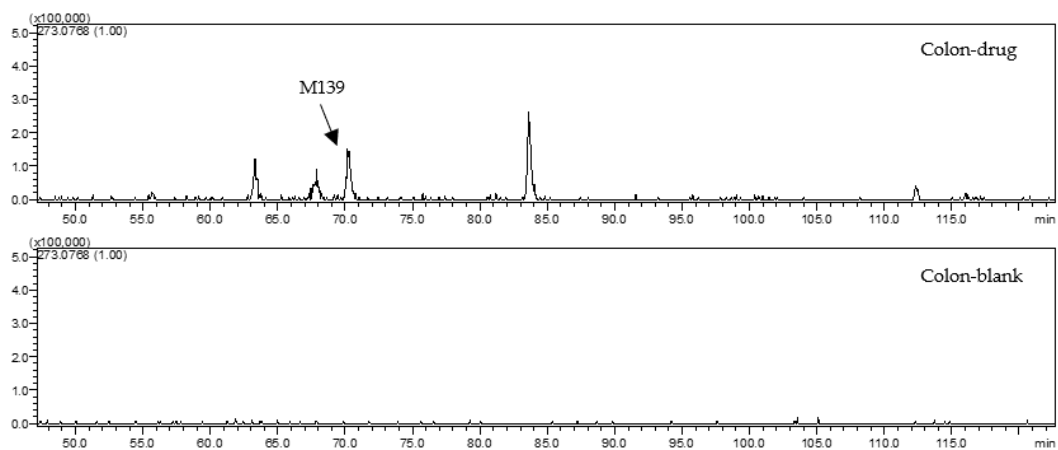

Figure S35. EICs of  $m/z$  273.0768 in drug colon and blank colon in ESI- mode.

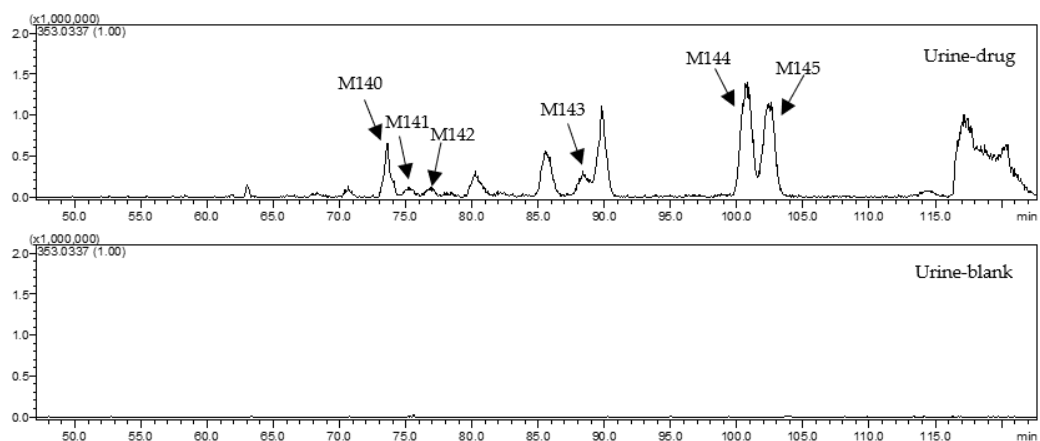

Figure S36. EICs of  $m/z$  353.0337 in drug urine and blank urine in ESI- mode.

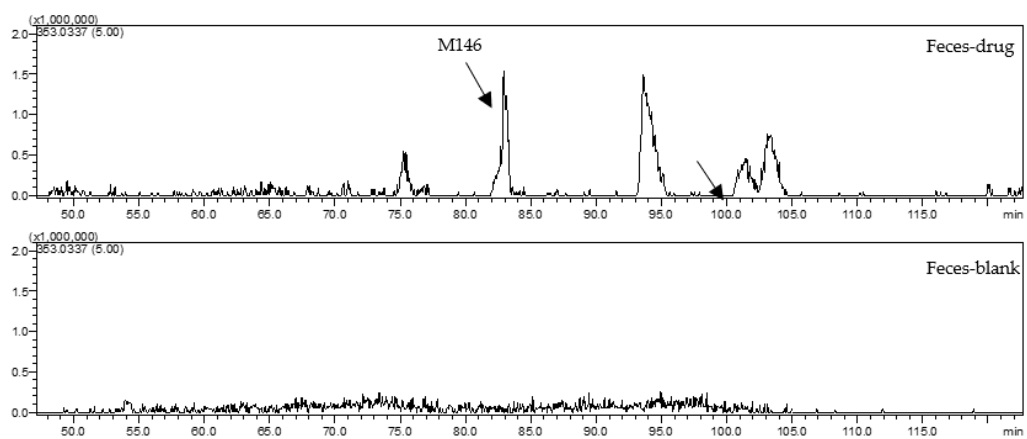

Figure S37. EICs of  $m/z$  353.0337 in drug feces and blank feces in ESI- mode.

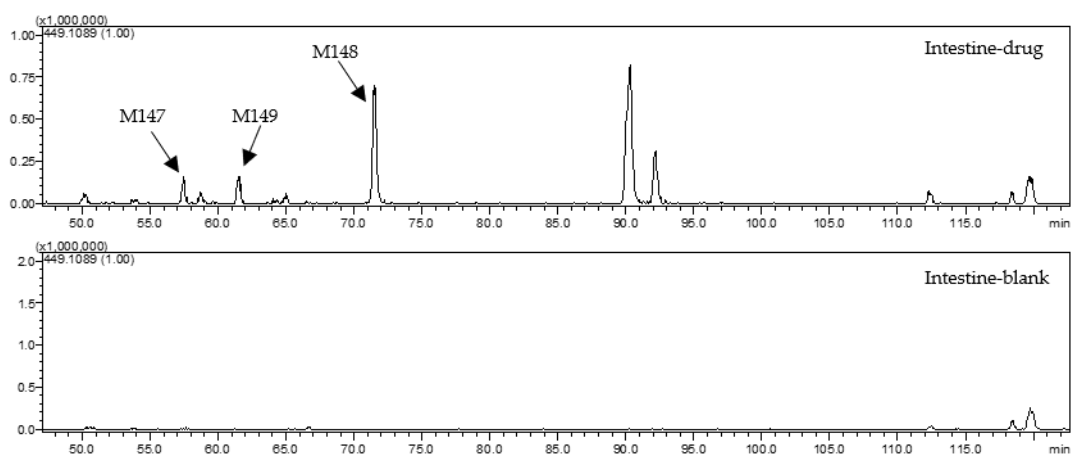

Figure S38. EICs of  $m/z$  449.1089 in drug intestine and blank intestine in ESI- mode.

(9) metabolites (M150–M156) having the skeleton of demethylated and dihydroxylated medicarpin

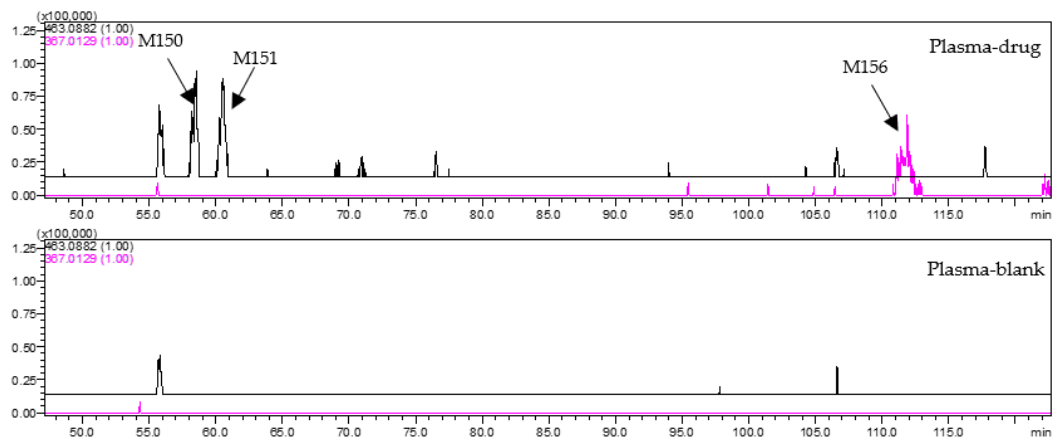

Figure S39. EICs of  $m/z$  463.0882 and 367.0129 in drug plasma and blank plasma in ESI- mode.

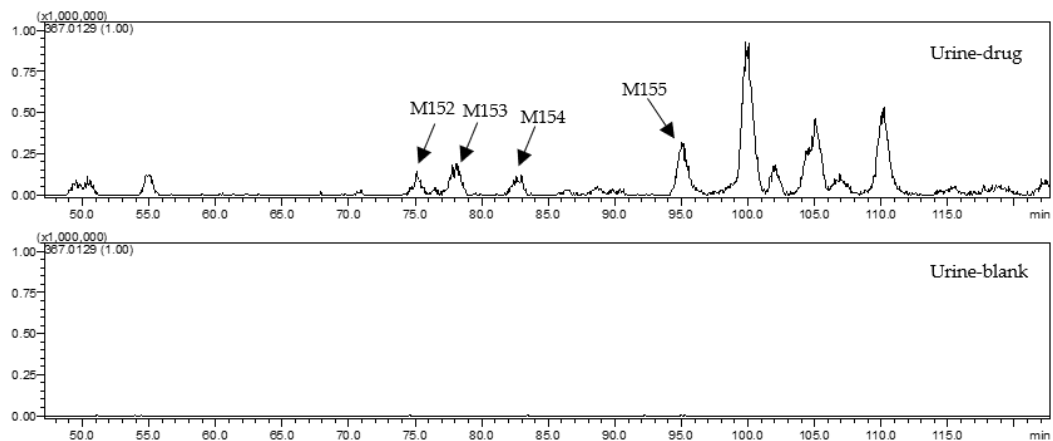

Figure S40. EICs of  $m/z$  367.0129 in drug urine and blank urine in ESI- mode.

(10) metabolites (M157–M161) having the skeleton of dihydroxylated medicarpin

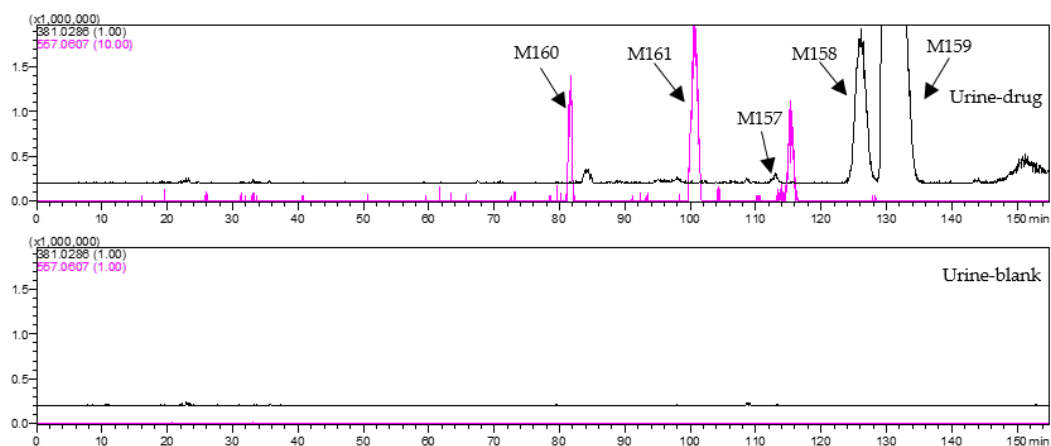

Figure S41. EICs of  $m/z$  381.0286 and 557.0607 in drug urine and blank urine in ESI- mode.

(11) metabolite (M162) having the skeleton of hydrogenated and dihydroxylated medicarpin

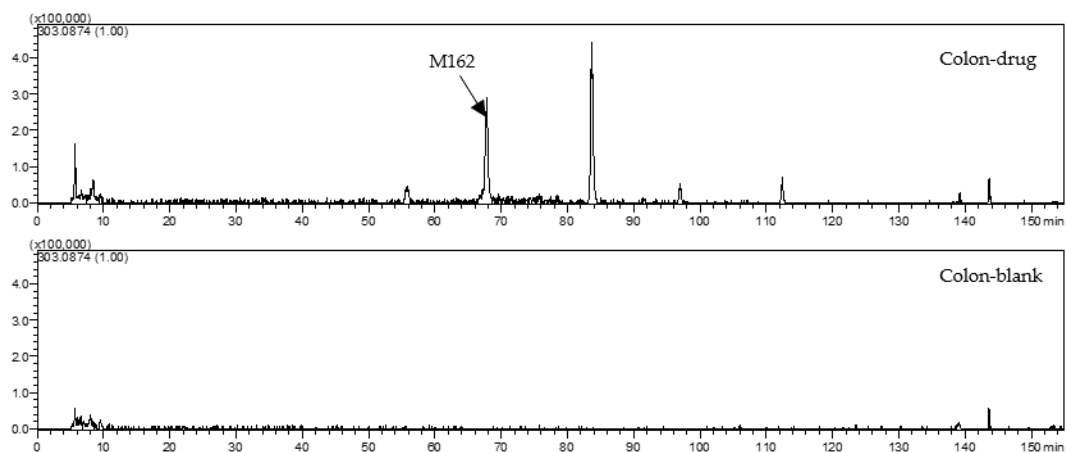

Figure S42. EICs of  $m/z$  303.0874 in drug colon and blank colon in ESI- mode.

(12) metabolites (M163–M164) having the skeleton of hydrogenated and trihydroxylated medicarpin

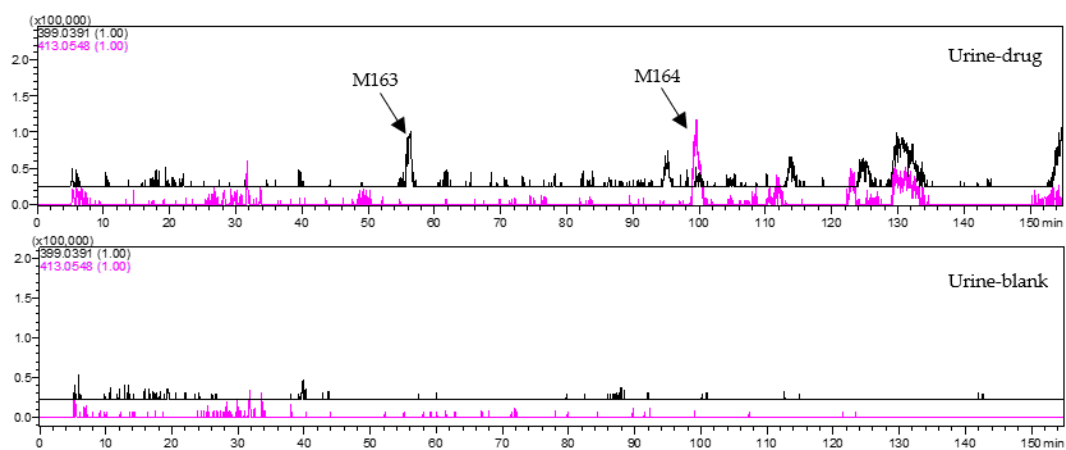

Figure S43. EICs of  $m/z$  399.0391 and 557.0607 in drug urine and blank urine in ESI- mode.

(13) metabolite (M165) has the skeleton of demethylated, hydrogenated and dihydroxylated medicarpin

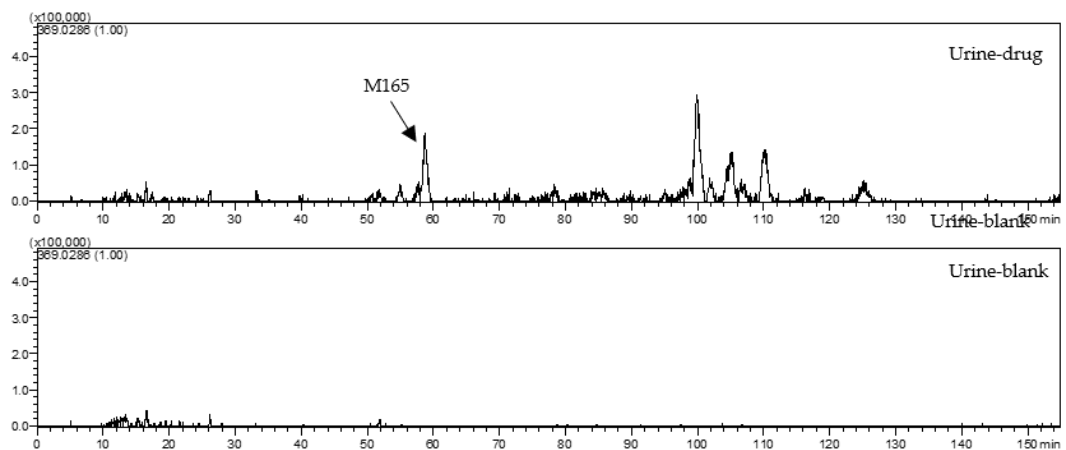

Figure S44. EICs of  $m/z$  369.0286 in drug urine and blank urine in ESI- mod.

## 2. The MS spectra of M4, M10, M37, M112, M114, M115, M144 and M159 (Figure S45–S52)

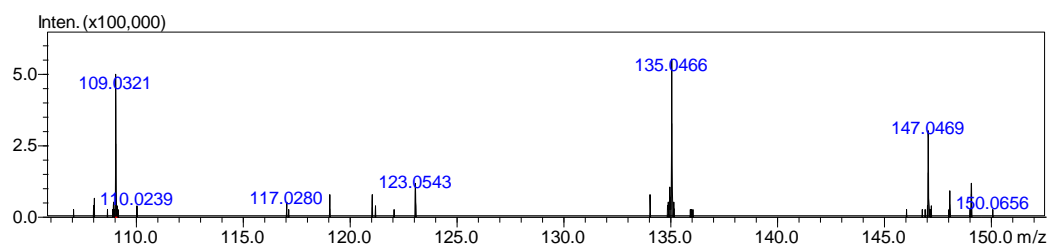

Figure S45. The MS<sup>2</sup> spectrum of M4.

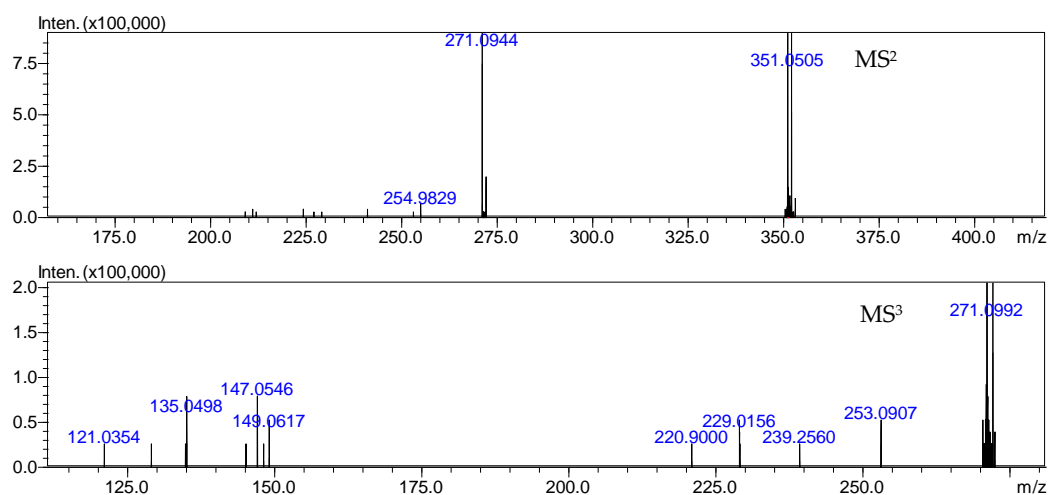

Figure S46. The MS<sup>2</sup> and MS<sup>3</sup> spectra of M10.

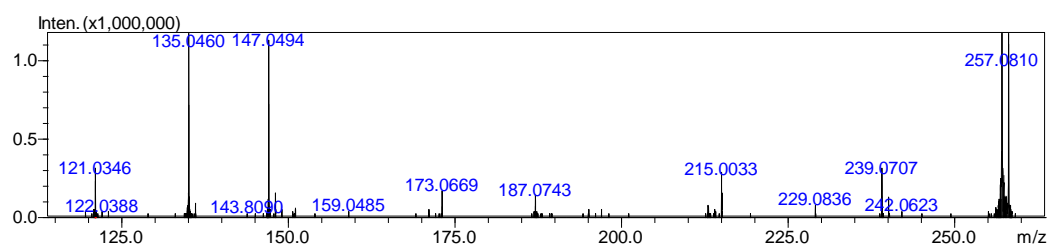

Figure S47. The MS<sup>2</sup> spectrum of M37.

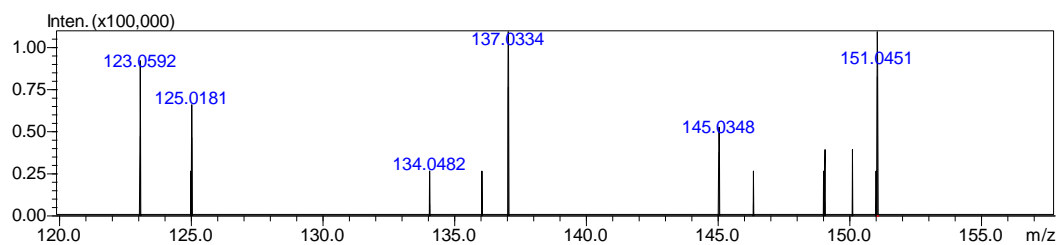

Figure S48. The MS<sup>2</sup> spectra of M112.



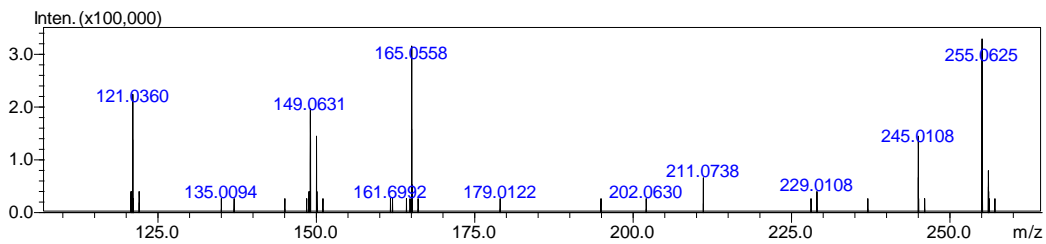

Figure S49. The MS<sup>2</sup> spectrum of **M114**.

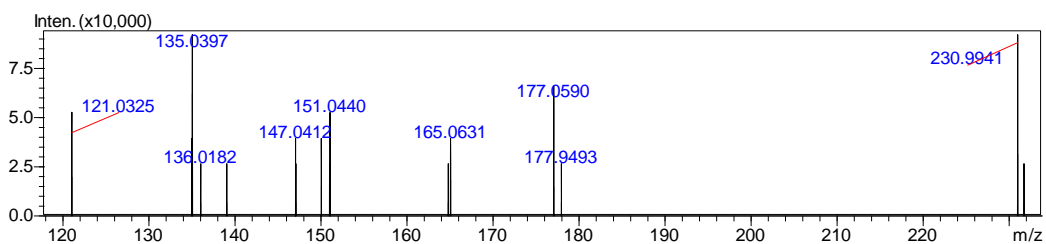

Figure S50. The MS<sup>2</sup> spectrum of **M115**.

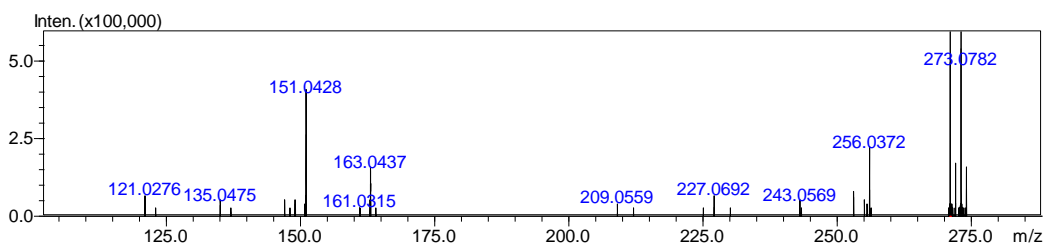

Figure S51. The MS<sup>2</sup> spectrum of **M144**.

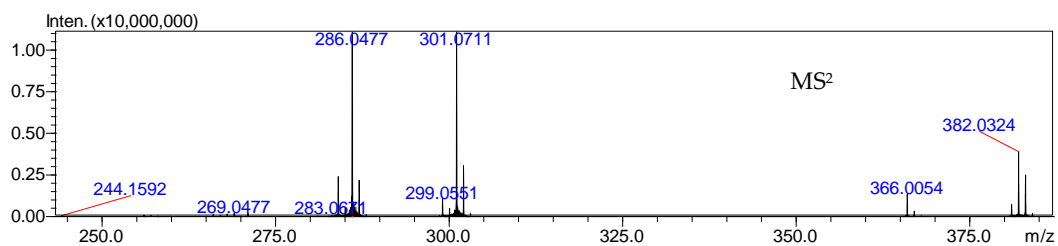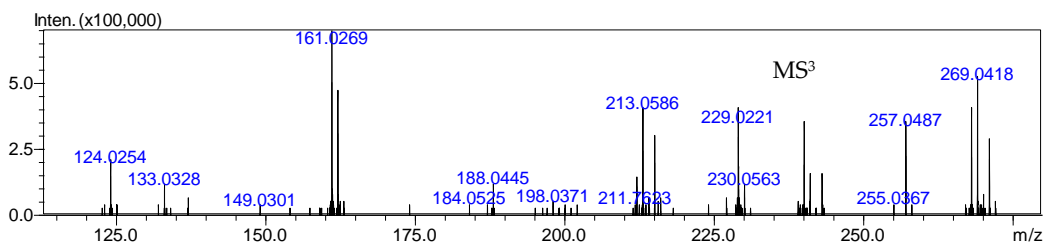

Figure S52. The MS<sup>2</sup> and MS<sup>3</sup> spectra of **M159**.
